# Supplementary material
Source: PubMed Central journal article supplement (PMC5568089)
Supplement: NIHMS895640-supplement.pdf [file NIHMS895640-supplement.pdf]

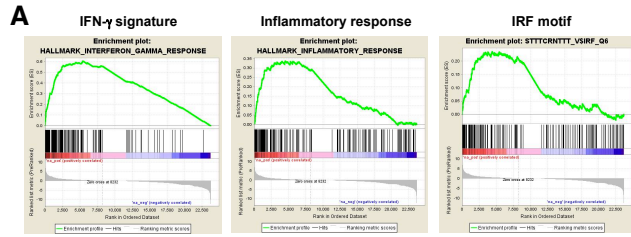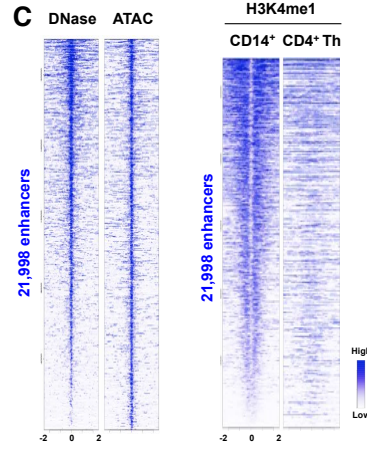

**B** IFN- $\gamma$ -repressed genes

| Pathway  | Gene Set Name                                 | p-value  |
|----------|-----------------------------------------------|----------|
| REACTOME | HEMOSTASIS                                    | 2.14E-17 |
| HALLMARK | COAGULATION                                   | 6.57E-15 |
| HALLMARK | EPITHELIAL_MESENCHYMAL_TRANSITION             | 9.16E-13 |
| REACTOME | PLATELET_ACTIVATION_SIGNALING_AND_AGGREGATION | 9.32E-10 |
| HALLMARK | ADIPOGENESIS                                  | 1.55E-07 |
| KEGG     | LYSOSOME                                      | 7.68E-06 |
| KEGG     | ENDOCYTOSIS                                   | 1.09E-03 |
| KEGG     | PPAR_SIGNALING_PATHWAY                        | 2.71E-03 |

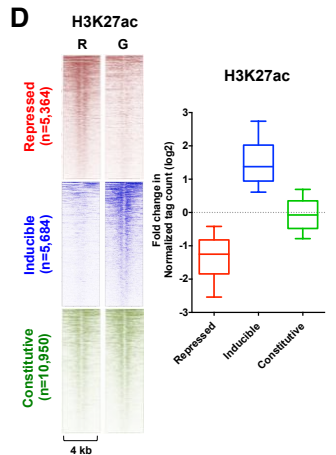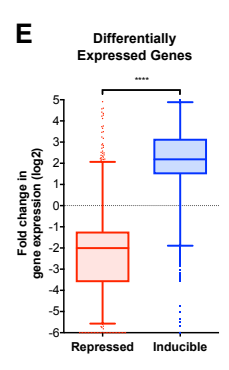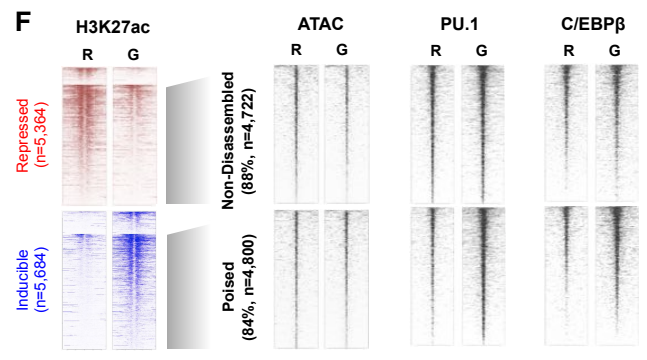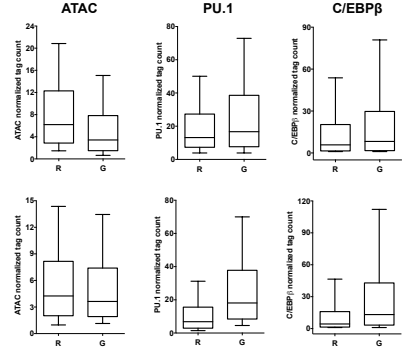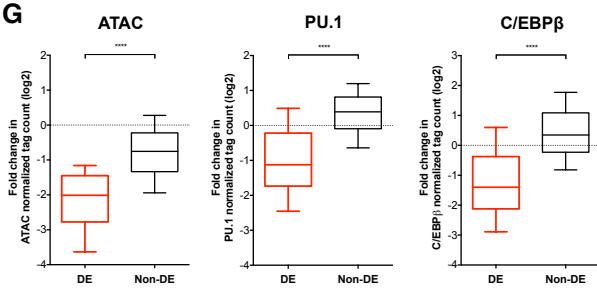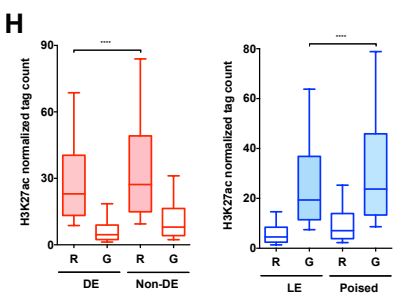

**I**

|               | ATAC-seq | PU.1    | C/EBP $\beta$ | Pol2   | SMC1   |
|---------------|----------|---------|---------------|--------|--------|
| Resting       | 91,225   | 54,236  | 32,089        | 21,769 | 44,039 |
| IFN- $\gamma$ | 72,306   | 104,987 | 41,194        | 23,242 | 64,293 |
| Donor #       | 1+1      | 2+2     | 2+3           | 2      | 5+3    |

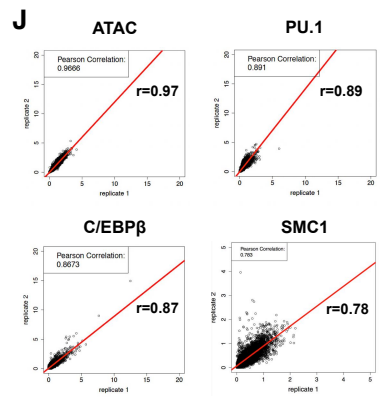

**Figure S1. Analysis of RNA-seq Data and of Enhancers that were Suppressed but not Disassembled by IFN- $\gamma$ , Related to Figure 1**

(A) Gene set enrichment analysis (GSEA) of IFN- $\gamma$ -regulated genes reveals that IFN- $\gamma$ -inducible genes in this study are enriched in defined gene sets from MSigDB (Broad Institute) of interferon gamma response, inflammatory response and IRF promoter motifs.

(B) The significantly enriched GSEA/MSigDB pathways (HALLMARK, KEGG and REACTOME) for IFN- $\gamma$ -repressed genes.

(C) Left shows congruence of ATAC-seq peaks and DNase-seq peaks from ENCODE project. Heat maps of normalized tag densities for DNase-seq (CD14<sup>+</sup> monocytes from ENCODE, GSM1024791) and ATAC-seq (monocyte-derived macrophages used in this project) at the 21,998 enhancers defined and analyzed in this project. Right shows heat maps of normalized tag densities for H3K4me1 ChIP-seq from CD14<sup>+</sup> monocytes (left, GSM1102793) and CD4<sup>+</sup> T cells (right, GSM1220567) at the 21,998 enhancers defined in this project. Four-kilobase windows are shown centered at the midpoints of the ATAC-seq peak.

(D) Heat maps of normalized tag densities for the H3K27-Ac histone mark at IFN- $\gamma$ -repressed, IFN- $\gamma$ -inducible and constitutive enhancers in resting (R) and IFN- $\gamma$ -primed (G) macrophages. The boxplots show the fold changes in normalized tag counts for the three distinct sets of enhancers (repressed, inducible, and constitutive). All enhancers are shown ordered by H3K27-Ac signal; Figure 1E shows the same data but breaks out the disassembled and latent enhancers. Boxes encompass the 25th to 75th percentile changes. Whiskers extend to 10th and 90th percentiles. The central horizontal bar indicates the median fold change.

(E) Box plots of the fold change in gene expression after IFN- $\gamma$  treatment for the nearest differentially expressed genes (within 100 kb) from IFN- $\gamma$ -repressed enhancers (red) or IFN- $\gamma$ -inducible enhancers (blue). \*\*\*\* $P < 0.0001$  by Welch's  $t$ -test.

(F) Heat maps of H3K27ac, ATAC-seq, PU.1 and C/EBP $\beta$  signals at enhancers that were regulated by IFN- $\gamma$ . The left panels show H3K27ac signals for all regulated enhancers, defined by >2-fold change in H3K27ac between resting (R) and IFN- $\gamma$ -primed (G) macrophages. The right 3 panels show a breakout of ATAC-seq, PU.1, and/or C/EBP $\beta$  signals for enhancers where these signals changed by less than or equal to 2-fold. The upper panels show enhancers that were suppressed by IFN- $\gamma$ ; suppressed enhancers that maintained open chromatin and PU.1 or C/EBP $\beta$  binding are termed 'non-disassembled enhancers'. Enhancers that exhibit open chromatin prior to activation correspond to poised enhancers as previously described. The box plots indicate normalized tag counts at non-DEs (upper right panels) and poised enhancers (lower right panels).

(G) Box plots of the fold change in normalized tag counts for ATAC-seq (left), PU.1 (middle) and C/EBP $\beta$  (right) at disassembled (DE) *versus* non-disassembled enhancers (non-DE). DEs exhibited significantly decreased chromatin accessibility and PU.1 and C/EBP binding than did non-DEs; \*\*\*\* $P < 0.0001$  by Welch's  $t$ -test.

(H) Box plots of normalized H3K27ac tag counts for DEs versus non-DEs (left) and for latent versus poised enhancers (right). R = unstimulated, G = IFN- $\gamma$ -stimulated human macrophages. \*\*\*\* $P < 0.0001$  by Welch's  $t$ -test.

(I) Peak numbers detected by HOMER version 4.7.2. Each ChIP-seq replicate used pooled samples from independent experiments with different donors.

(J) Correlation of ATAC-seq and ChIP-seq replicates.

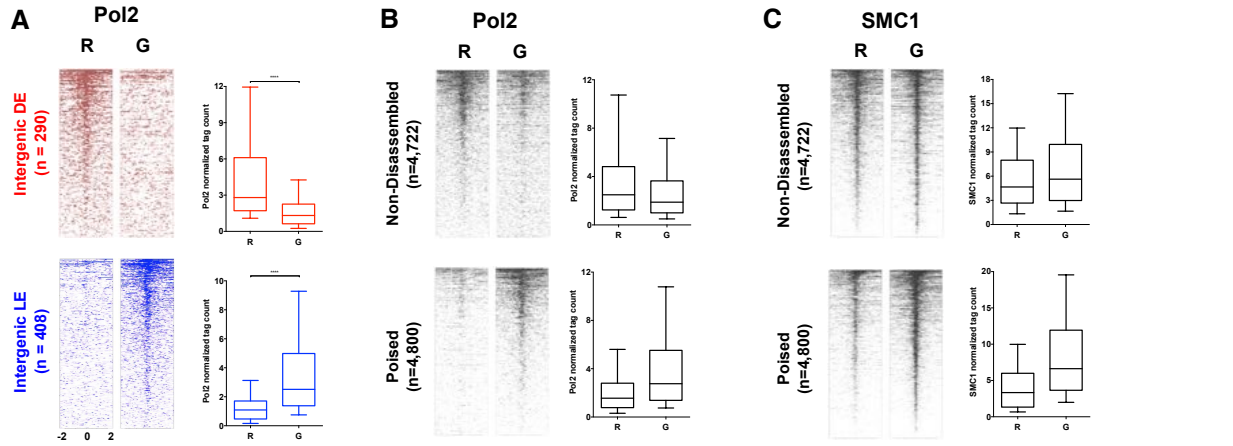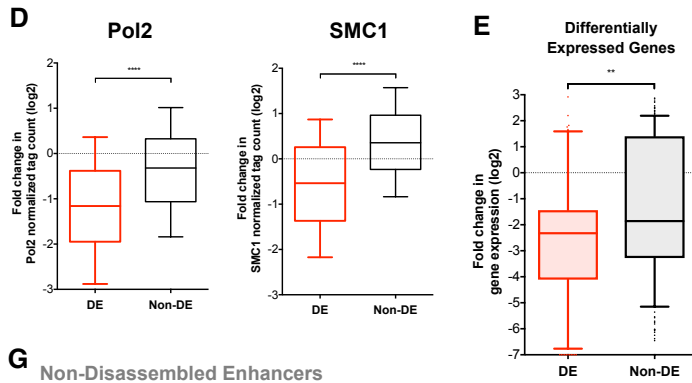

**F** Selected Genes associated with Disassembled-Enhancers

**Phagocytosis** (Endocytosis)  
*DAB2, AP2A2, MSR1, AP1B1, ITSN1, MARCO, MERTK, THBS1*

**Angiogenesis** (vasculogenesis)  
*ANG, EPHB3, RHOB, THBS1, ZFP36L1, SGPL1*

**Wound healing**  
*CELSR1, HRH1, ITGA9, MAP3K1, THBS1, MERTK*

**Lipid binding**  
*MSR1, THBS1, MAP3K1, PLTP, NISCH*

**Glycosylation** (Acetylglucosaminyltransferase activity)  
*MGAT4A, XYLT1, B3GNT2, MGAT5*

**G** Non-Disassembled Enhancers

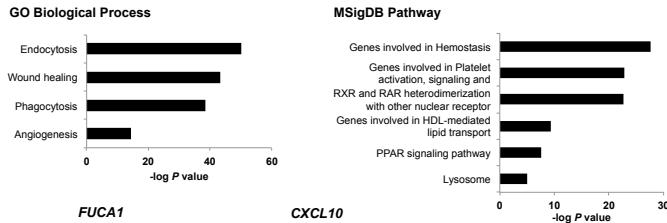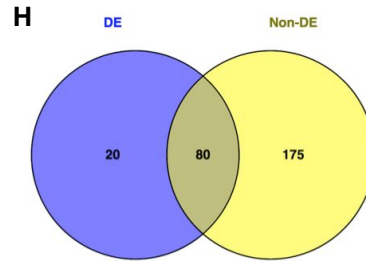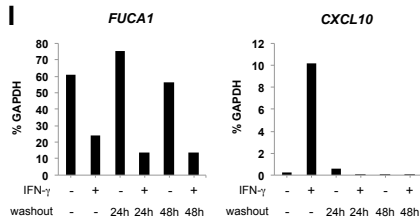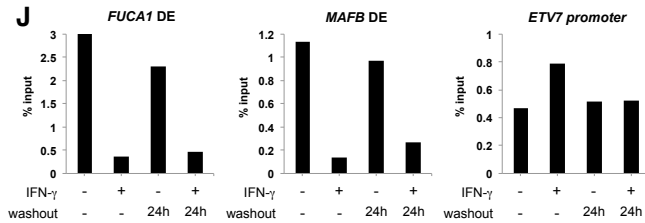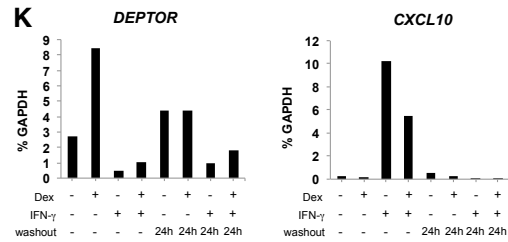

## Figure S2. Regulation of Non-Disassembled Enhancers by IFN- $\gamma$ , Related to Figure 2

(A) Heat maps of normalized tag densities for the Pol II ChIP-seq at 290 intergenic disassembled enhancers (DE) and 408 intergenic latent enhancers (LE) in resting (R) and IFN- $\gamma$ -primed (G) macrophages. Four-kilobase windows are shown centered at the midpoints of the ATAC-seq peak. The box plots indicate normalized tag counts at intergenic DEs (upper right panels) and intergenic LEs (lower right panels). \*\*\*\* $P < 0.0001$  by paired-samples Wilcoxon signed-rank test.

(B) Heat maps of normalized tag densities for Pol II ChIP-seq at non-disassembled enhancers and poised enhancers in resting (R) and IFN- $\gamma$ -primed (G) macrophages. The box plots indicate normalized tag counts at non-DEs (upper right panels) and poised enhancers (lower right panels).

(C) Heat maps of normalized tag densities for SMC1 ChIP-seq at non-disassembled enhancers and poised enhancers in resting (R) and IFN- $\gamma$ -primed (G) macrophages. The box plots indicate normalized tag counts at non-DEs (upper right panels) and poised enhancers (lower right panels).

(D) Pol II and SMC1 occupancy are more strongly downregulated by IFN- $\gamma$  at DEs relative to non-DEs. Box plots of the fold change in normalized tag counts for Pol II (left) and SMC1 (right) ChIP-seq at disassembled (DE) or non-disassembled enhancers (non-DE). \*\*\*\* $P < 0.0001$  by Welch's  $t$ -test.

(E) Genes associated with DEs are more strongly downregulated by IFN- $\gamma$  than genes associated with non-DEs. Box plots show fold change in gene expression after IFN- $\gamma$  stimulation. \*\* $P = 0.0017$  by Welch's  $t$ -test.

(F) List of selected genes associated with disassembled enhancers that play important roles in M2-like macrophages identified using DAVID and GSEA. The top 100 DE-associated genes are shown in Table S1.

(G) Functionally enriched Gene Ontology (GO) and MSigDB pathway categories of genes associated with non-disassembled enhancers.

(H) Venn diagram showing number of genes associated with only DE (20, blue), only non-DE (175, yellow), and with both DE and non-DE (80, overlap).

(I) RT-qPCR analysis of the DE-associated gene *FUCA1* in macrophages cultured with or without IFN- $\gamma$  for 48 hr, followed by washout and incubation in fresh medium for 24 hr or 48hr. *CXCL10* expression serves as a control indicating the termination of IFN- $\gamma$  signal after washout.

(J) FAIRE analysis of disassembled enhancers in macrophages cultured with or without IFN- $\gamma$  for 48 hr, followed by washout and incubation in fresh medium for 24 hr. *ETV7* promoter serves as a specificity control.

(K) RT-qPCR analysis of the DE-associated, GC-inducible *DEPTOR*. Cells were cultured as in (I), except dexamethasone (Dex) was added 3 hr prior to harvesting.

Data (I – K) are representative of two experiments.

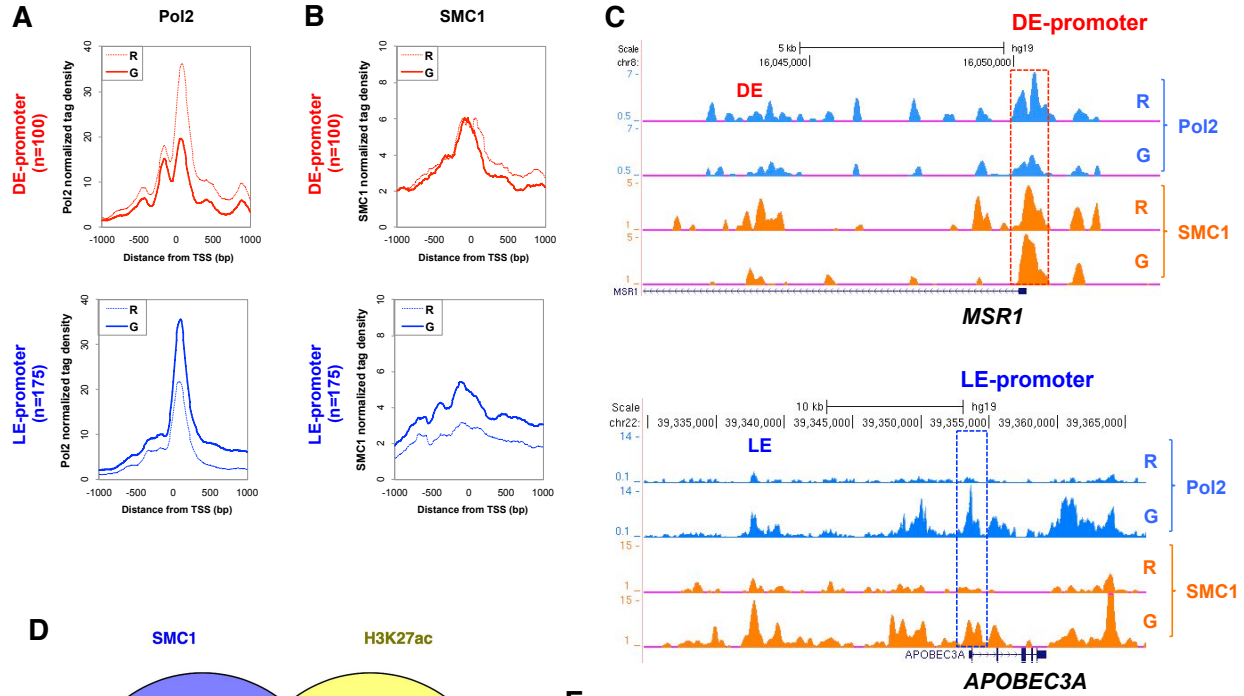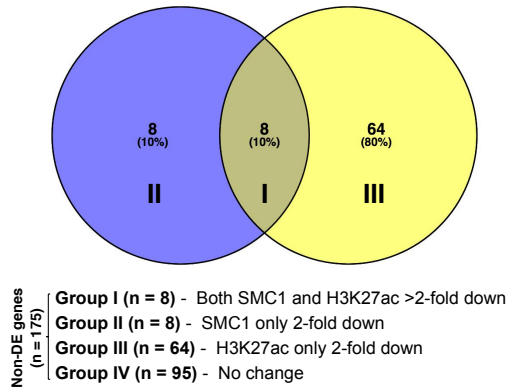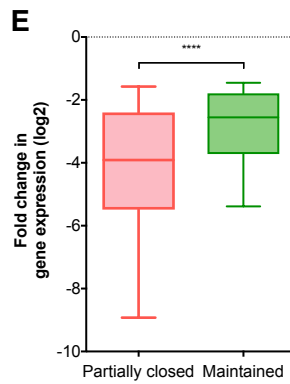

**F** **Partially closed Promoters (n=62)**

| Motif | TF  | P-value |
|-------|-----|---------|
|       | TBP | 1e-4    |
|       | NFY | 1e-4    |

**Maintained Promoters (n=596)**

| Motif | TF  | P-value |
|-------|-----|---------|
|       | NFY | 1e-19   |
|       | Sp1 | 1e-19   |
|       | KLF | 1e-15   |
|       | TBP | 1e-8    |

**Figure S3. Regulation of Pol II and Cohesin Occupancy at Promoters by IFN- $\gamma$ , Related to Figure 3**

(A) Distribution of average ChIP-seq signal of Pol II at promoters of DE-associated genes (red, upper panel) or LE-associated genes (blue, lower panel) in resting (R, dotted line) and IFN- $\gamma$ -primed (G, solid line) macrophages.

(B) Distribution of average ChIP-seq signal of SMC1 at promoters of DE-associated genes (red, upper panel) or LE-associated genes (blue, lower panel) in resting (R, dotted line) and IFN- $\gamma$ -primed (G, solid line) macrophages.

(C) Representative UCSC Genome Browser tracks showing the change of RNA polymerase II (Pol2) and cohesin (SMC1) occupancy at promoters of *MSR1* and *APOBEC3A* genes in resting (R) and IFN- $\gamma$ -activated (G) macrophages. Boxes enclose promoter of gene associated with disassembled enhancer (DE, top) and latent enhancer (LE, bottom).

(D) Regulation of H3K27ac and SMC1 at promoters of IFN- $\gamma$ -repressed genes associated with non-disassembled enhancers (n=175 genes). Venn diagram showing the number of promoters of non-DE genes that exhibited > 2-fold decreases in normalized tag counts for SMC1 ChIP-seq alone (8, blue), H3K27ac alone (64, yellow) or both SMC1 and H3K27ac (8, overlap).

(E) Box plot showing  $\log_2$  fold change in gene expression of genes associated with partially closed promoters (n=62) and promoters who chromatin accessibility was preserved after IFN- $\gamma$  stimulation (n=596). \*\*\*\* $P < 0.0001$  by Welch's  $t$ -test.

(F) Motif enrichment analysis of promoters with partially closed or maintained chromatin accessibility after IFN- $\gamma$  treatment.

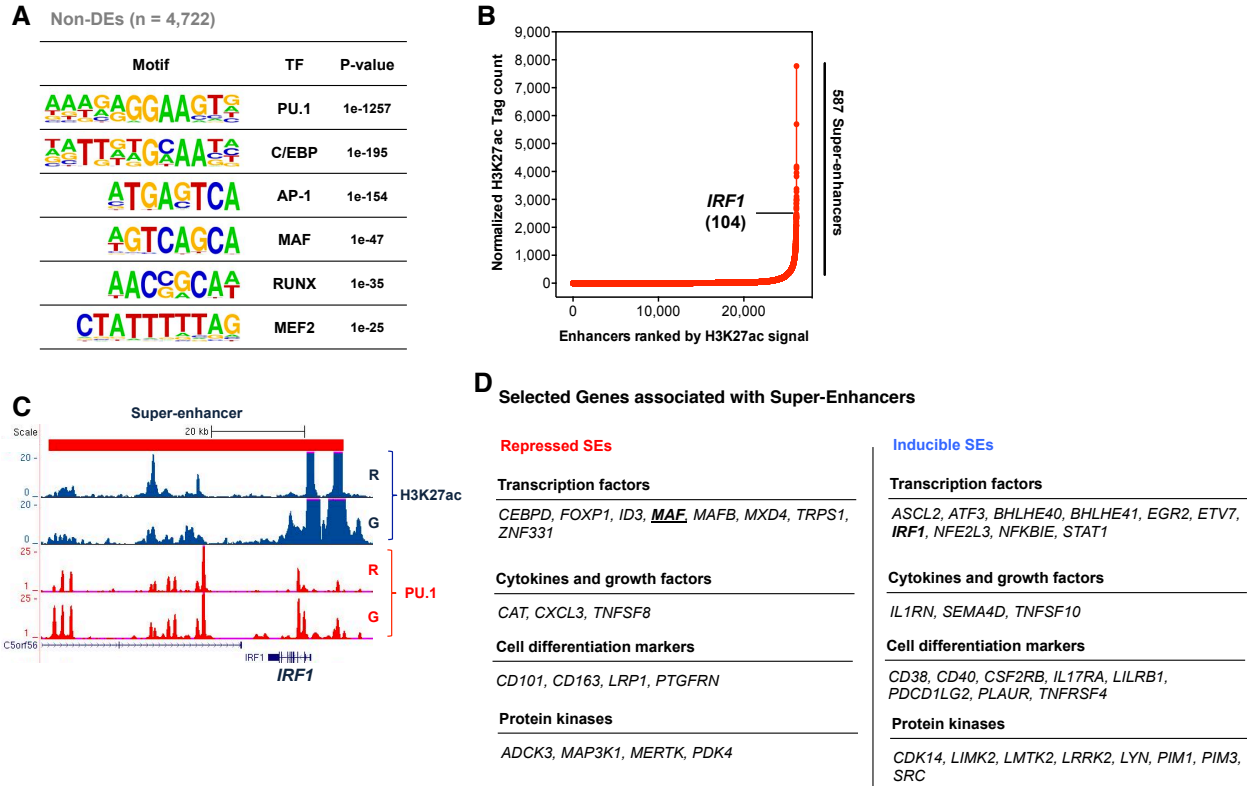

**Figure S4. Dynamic Super-Enhancers Associated with Candidate Regulators of Macrophage Function During IFN- $\gamma$  Stimulation, Related to Figure 4**

(A) Most significantly enriched transcription factor (TF) motifs identified by *de novo* motif analysis using HOMER at non-disassembled enhancers.

(B) Induced super-enhancers (based on >2-fold increase in H3K27ac tag counts in response to IFN- $\gamma$ ) are plotted in an increasing order of H3K27ac signal. Super-enhancers (SEs) are defined as the population of enhancers above the inflection point of the curve.

(C) A highly ranked inducible SE at the *IRF1* locus.

(D) List of selected genes associated with repressed- (left) or induced- (right) SEs. Genes are grouped according to gene families using GSEA.

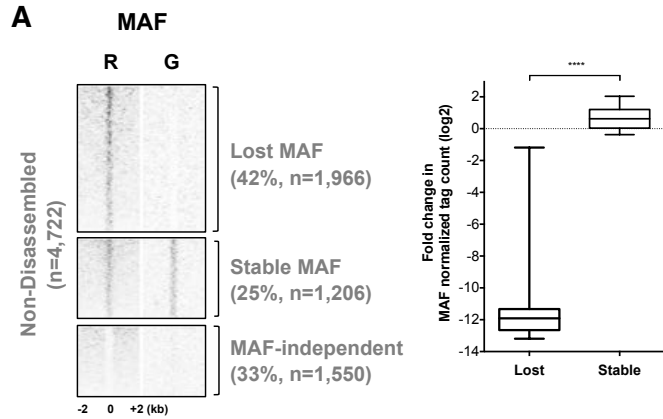

**B** Lost MAF Non-DE (n = 1,966)

| Motif | TF    | P-value |
|-------|-------|---------|
|       | PU.1  | 1e-510  |
|       | C/EBP | 1e-97   |
|       | AP-1  | 1e-85   |
|       | MAF   | 1e-27   |

Stable MAF Non-DE (n = 1,206)

| Motif | TF    | P-value |
|-------|-------|---------|
|       | PU.1  | 1e-323  |
|       | C/EBP | 1e-38   |
|       | AP-1  | 1e-32   |
|       | MAF   | 1e-28   |

MAF independent Non-DE (n = 1,550)

| Motif | TF    | P-value |
|-------|-------|---------|
|       | PU.1  | 1e-368  |
|       | C/EBP | 1e-57   |
|       | RUNX  | 1e-13   |

**C**

| MAF-bound       | Lost  | Stable | Sum   |
|-----------------|-------|--------|-------|
| DE              | 338   | 154    | 492   |
| Non-DE          | 1,966 | 1,206  | 3,172 |
| Other Enhancers | 744   | 371    | 1,115 |
| Total Enhancers | 3,048 | 1,731  | 4,779 |

| Enhancers       | IFN- $\gamma$ -repressed genes |
|-----------------|--------------------------------|
| DE              | 100                            |
| MAF+lost        | 66 (66%)                       |
| MAF+stable      | 16 (16%)                       |
| MAF-independent | 18 (18%)                       |

| Enhancers       | IFN- $\gamma$ -repressed genes |
|-----------------|--------------------------------|
| Non-DE          | 175                            |
| MAF+lost        | 101 (58%)                      |
| MAF+stable      | 42 (24%)                       |
| MAF-independent | 32 (18%)                       |

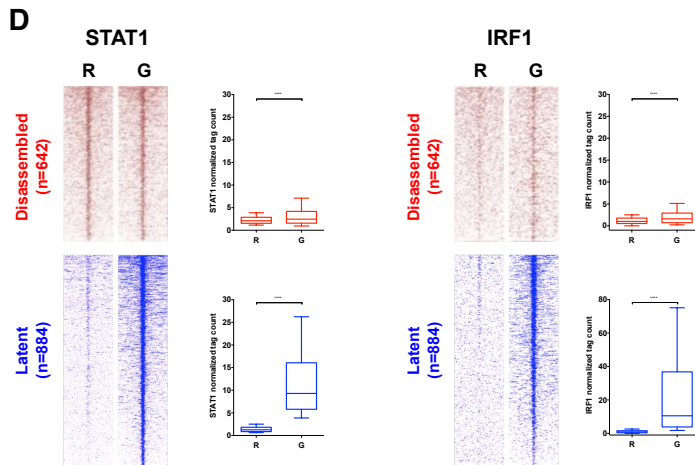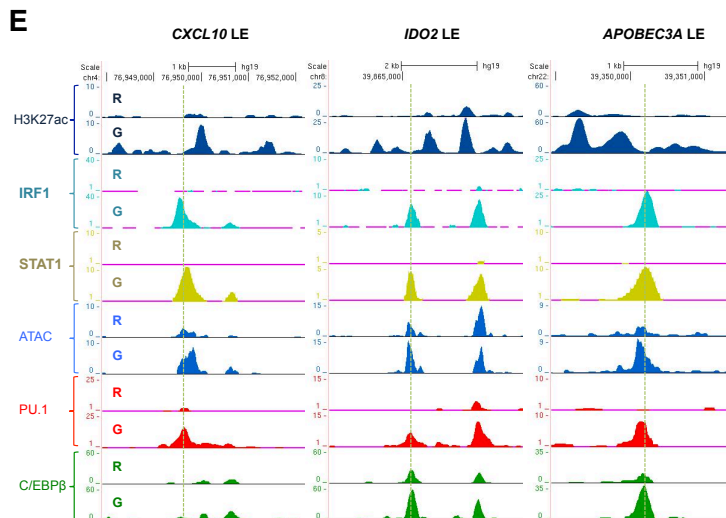



**Figure S5. IFN- $\gamma$ -inducible STAT1 and IRF1 Binding to Latent Enhancers but not to Disassembled Enhancers, Related to Figure 5**

(A) Heat map of normalized tag counts for MAF ChIP-seq at non-disassembled enhancers where MAF binding was lost or stable after IFN- $\gamma$  treatment, or was not detected (MAF-independent). The boxplot shows the fold changes in normalized tag counts for the two distinct groups of non-disassembled enhancers (lost and stable). \*\*\*\*  $P < 0.0001$ , by Welch's  $t$ -test.

(B) Most significantly enriched transcription factor (TF) motifs identified by *de novo* motif analysis using HOMER (Heinz et al., 2010) at non-disassembled enhancers where MAF binding was lost (upper panel), stable (middle panel) or not detected (lower panel). Enrichment of the MAF motif was not detected in enhancers that did not bind MAF in ChIP-seq.

(C) Upper table summarizes MAF binding and its loss after IFN- $\gamma$  treatment at various types of enhancers. Left lower table summarizes the number of IFN- $\gamma$ -repressed genes associated with three different subsets of disassembled enhancers. Lower right table summarizes the number of IFN- $\gamma$ -repressed genes associated with three different subsets of non-disassembled enhancers.

(D) Heat maps of normalized tag densities for STAT1 and IRF1 ChIP-seq at DEs and LEs in resting (R) and IFN- $\gamma$ -primed (G) macrophages. Four-kilobase windows are shown centered at the midpoints of the ATAC-seq peak. The box plots indicate normalized tag counts at DEs (upper right panels) and LEs (lower right panels).

(E) Representative UCSC Genome Browser tracks displaying normalized profiles for active histone mark (H3K27ac), IFN- $\gamma$ -activated TFs (IRF1 and STAT1), open chromatin (ATAC-seq), and lineage-determining transcription factors (PU.1 and C/EBP $\beta$ ) signals at latent enhancers (LEs) of *CXCL10*, *IDO2*, and *APOBEC3A* genes in resting (R) and IFN- $\gamma$ -primed (G) macrophages.

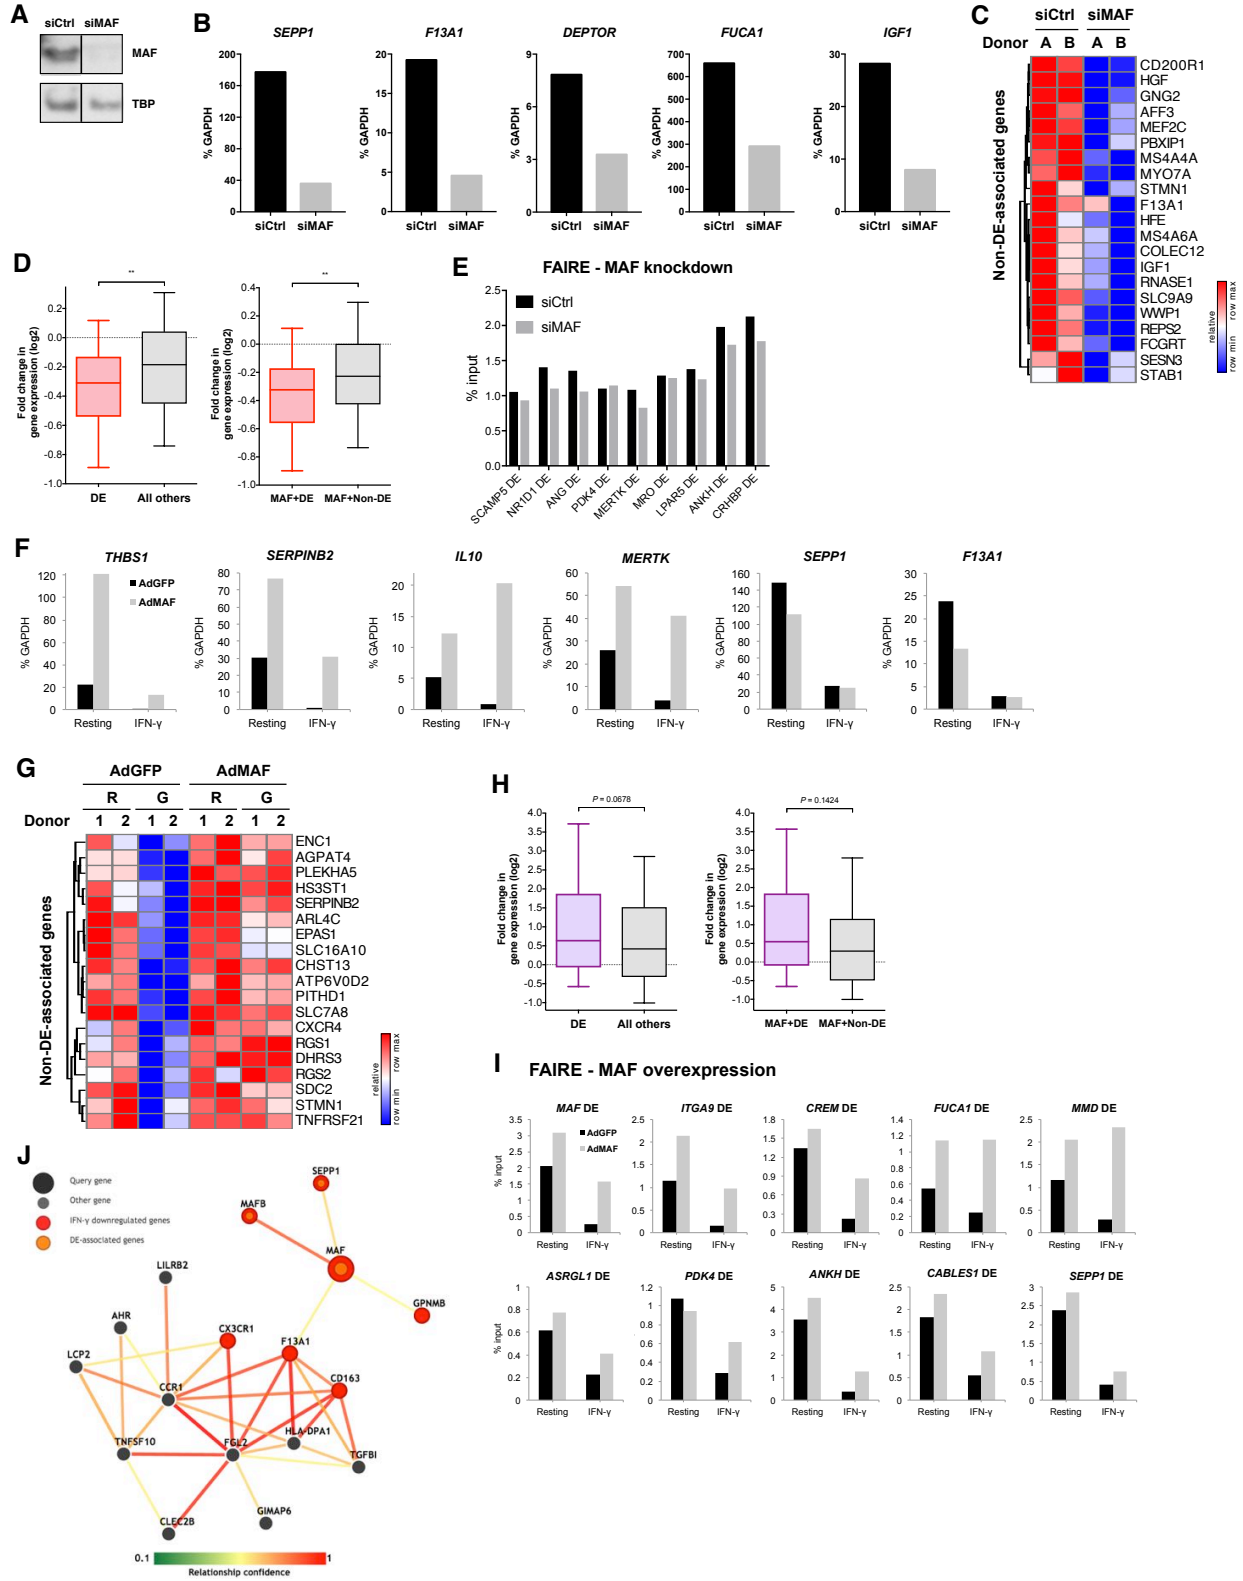

**Figure S6. MAF associates with a Subset of Non-Disassembled Enhancers, Related to Figure 6.**

(A) Immunoblot of lysates from macrophages transfected with control or *MAF*-specific siRNAs probed with MAF and TBP antibodies. Two lanes from the same gel were juxtaposed (marked by vertical black line).

(B) Expression of mRNA of *SEPP1*, *F13A1*, *DEPTOR*, *FUCA1* and *IGF1* was measured by RT-qPCR and normalized relative to GAPDH mRNA in resting human macrophages transfected with scrambled control siRNA (siCtrl) or *MAF*-specific siRNA (siMAF). Data are representative of at least three independent experiments.

(C) Heat map showing relative expression of representative non-DE-associated genes that are significantly downregulated by RNAi of *MAF* ( $p < 0.05$ ).

(D) RNAi of *MAF* preferentially affects expression of MAF-bound and DE-associated genes. Box plots show fold change in gene expression after RNAi of *MAF* in resting human macrophages.  $**P = 0.0068$  and  $**P = 0.0062$  by Welch's *t*-test.

(E) FAIRE analysis of disassembled enhancers in resting macrophages treated with a control siRNA (siCtrl) or with the *MAF*-specific siRNA (siMAF). Signal is shown as percent of input. Data are representative of two independent experiments.

(F) RT-qPCR analysis of mRNA of *THBS1*, *SERPINB2*, *IL10*, *MERTK*, *SEPP1* and *F13A1* in IFN- $\gamma$ -stimulated macrophages transduced with adenoviral particles encoding MAF (AdMAF) or GFP (AdGFP). Data are representative of at least three independent experiments.

(G) Heat map showing relative expression of representative non-DE-associated genes that are significantly upregulated by ectopic MAF expression ( $p < 0.05$ ).

(H) Ectopic expression of MAF preferentially affects expression of DE-associated genes. Box plots show fold change in gene expression after ectopic MAF expression in IFN- $\gamma$ -stimulated human macrophages. The *p* values were generated by Welch's *t*-test.

(I) FAIRE analysis of disassembled enhancers (DEs) in resting and IFN- $\gamma$ -stimulated macrophages transduced with control (AdGFP) or with MAF-expressing (AdMAF) adenoviral particles. Signal is shown as percent of input. Data are representative of two independent experiments.

(J) The functional network analyzed by querying the ImmuNet database (Toll-like receptor signaling pathway network) with MAF, IFN- $\gamma$ -repressed gene sets (red circles), and DE-associated gene sets (orange circles). The visualization parameters used to generate the graph shown are minimum relationship confidence = 0.5 and maximum number of genes = 20.

**Table S1. The top 100 DE-associated genes**

|          |         |         |           |
|----------|---------|---------|-----------|
| SEPP1    | ITGA9   | KLF2    | RAPH1     |
| CD28     | RNASE4  | LDLRAD4 | TNFSF8    |
| KLHL13   | BMP2    | MERTK   | ZBTB4     |
| MRO      | LTBP2   | NISCH   | STARD13   |
| TMEM37   | KIF26B  | FOXP1   | XYLT1     |
| ROR2     | PLTP    | TESK2   | THADA     |
| GPR34    | PSCA    | AP2A2   | C20orf194 |
| ZNF704   | PMP22   | DCBLD1  | SOCS6     |
| CRHBP    | ITSN1   | MGAT4A  | ZFP36L1   |
| THBS1    | CELSR1  | MAML3   | DEF6      |
| ARMC9    | RHOB    | MAF     | MAFB      |
| DEPTOR   | EEDP1   | TMEM173 | MAP3K1    |
| FBLIM1   | ADAM11  | PPM1L   | LY86      |
| PDK4     | PEX11G  | SSBP2   | LPAR6     |
| LGMN     | LPAR5   | TANC2   | SWAP70    |
| MARCO    | HRH1    | SGPL1   | AP1B1     |
| CNRIP1   | SLMO1   | MGAT5   | MSR1      |
| CABLES1  | ANKH    | B3GNT2  | ADAM9     |
| MTSS1    | PDGFC   | CREM    | ZADH2     |
| EPHB3    | PIK3IP1 | CPQ     | ALOX5     |
| SCAMP5   | CRYL1   | FAM198B | C22orf29  |
| PTGFRN   | FUCA1   | APMAP   | KIAA0195  |
| PID1     | MMD     | NTAN1   | DAB2      |
| KIAA1147 | ASRGL1  | TRPS1   | ADCY9     |
| KIAA1671 | ZC3H12D | SMS     | RAPH1     |

**Table S2. The top 100 LE-associated genes**

|          |          |          |          |
|----------|----------|----------|----------|
| HSD11B1  | CD80     | SEMA4D   | CIR1     |
| CXCL10   | DGKG     | CDK14    | PLEK     |
| GBP5     | CCND2    | NFE2L3   | SPATA13  |
| IDO2     | EDN1     | STX11    | RAPGEF2  |
| APOBEC3A | MGC12916 | CLCN4    | ZNF366   |
| P2RY14   | NEDD9    | CD226    | JAK2     |
| CD274    | GPC4     | TRIB2    | ELOVL5   |
| FAM26F   | MREG     | TNFSF10  | GDPD5    |
| MYO7B    | F3       | MGAM     | USP6NL   |
| FLT1     | KCNE1    | PLEKHG3  | GLIPR2   |
| KREMEN1  | ASAP2    | PRKAR2B  | GK       |
| TGM2     | LIF      | P2RX7    | ANKRD33B |
| MYOF     | RMI2     | IL15     | LYN      |
| GPR88    | FBP1     | MX1      | ZCCHC2   |
| DCSTAMP  | SLIT2    | PPARGC1B | ATOX1    |
| CD38     | SOD2     | GP1BA    | HIVEP2   |
| MYEOV    | ALAS1    | VOPP1    | KLF9     |
| IL1RN    | SERPINA1 | DRAM1    | SLC1A3   |
| TRIM46   | SH2B2    | TAGAP    | EXT1     |
| CXCL11   | UBE2L6   | ISG20    | KLF10    |
| TMEM217  | PDE4B    | TMSB10   | KIAA0247 |
| EGR3     | RHBDF2   | FAM213A  | RAB39A   |
| GCH1     | NLRC5    | IRG1     | NFKBIA   |
| SNX10    | LMTK2    | OPTN     | CSF2RB   |
| BCL2A1   | C4orf32  | TRAF2    | NMI      |

**Table S3. Primers for mRNA expression**

|             |                         |
|-------------|-------------------------|
| hMAF_F      | CTGGCAATGAGCAACTCCGA    |
| hMAF_R      | AGCCGGTCATCCAGTAGTAGT   |
| hSEPP1_F    | AAAGCTCCTTATGTAAGCAACCC |
| hSEPP1_R    | ACAGTCACTGAACCATTGGAGT  |
| hF13A1_F    | CCCAATAACTCTAATGCAGCGG  |
| hF13A1_R    | ACCTTGTTAGTGTCCCATCTCTC |
| hDEPTOR_F   | TTAGCAGACCGGGGCATTATT   |
| hDEPTOR_R   | GAAGGTGCCGTCATCCTTTCT   |
| hFUCA1_F    | GAAGCCAAGTTCGGGGTGTT    |
| hFUCA1_R    | GGGTAGTTGTGCGGCATGA     |
| hTHBS1_F    | AGACTCCGCATCGCAAAGG     |
| hTHBS1_R    | TCACCACGTTGTTGTCAAGGG   |
| hSERPINB2_F | CAGCACCGAAGACCAGATGG    |
| hSERPINB2_R | CCTGCAAAATCGCATCAGGATAA |
| hIL10_F     | GACTTTAAGGGTTACCTGGGTTG |
| hIL10_R     | TCACATGCGCCTTGATGTCTG   |
| hMERTK_F    | CCACAATTTCTTGGTGGAAAGA  |
| hMERTK_R    | AGATGGGATCAGACACGATCTC  |
| hCXCL10_F   | GTGGCATTCAAGGAGTACCTC   |
| hCXCL10_R   | TGATGGCCTTCGATTCTGGATT  |

**Table S4. Primers for CHIP-qPCR and FAIRE assay**

|                |                         |             |                          |
|----------------|-------------------------|-------------|--------------------------|
| ChIP_control_F | GGTTGTGGTGGTAAGAAGTTGA  | MRO_DE_F    | GGAGACCCAGGGAAGAGTTG     |
| ChIP_control_R | TGAAAACACTCCAAGGCAGA    | MRO_DE_R    | ATAAGAAGTACCTCCCCTGA     |
| SEPP1_DE_F     | ACATTGCCAGGCAGTAAAGG    | LPAR5_DE_F  | ACGCTTAGGTTGCTGTTACT     |
| SEPP1_DE_R     | CGCAATTCCATTTTGTTC      | LPAR5_DE_R  | GCTGTGAACATGCCTGGAAC     |
| ITGA9_DE_F     | GACCAGGAAGCTCTTGAGGT    | ARMC9_DE_F  | ACCAACTGTGAGGAGCTAGG     |
| ITGA9_DE_R     | TTTGCCCCAAGAAAGCAGAC    | ARMC9_DE_R  | CGCAGTGCCTTAAATTTCTGAC   |
| MMD_DE_F       | AAGTTCCCCATTTCGAGGG     | ZNF704_DE_F | TTTCAGTCTGAGGAGGGCTG     |
| MMD_DE_R       | GCAGAGCAGGAGACAAATGG    | ZNF704_DE_R | CCTCTCTCCGCTCATGTGAT     |
| MAF_DE_F       | CTTGGCCTGGAGAATCTTGC    | DEPTOR_DE_F | AACCAGGGGAAATCTCTCAA     |
| MAF_DE_R       | AAGGGGAAGGAAGCTAACCC    | DEPTOR_DE_R | CAAACCTCTCCCTGAATAAACG   |
| FUCA1_DE_F     | GAAATTAGAAGAAGGGCCATGG  | GPR34_DE_F  | TGTGTGGCATTAAAGGAAGTGG   |
| FUCA1_DE_R     | CAGCCAGCTTTGACTTTGTC    | GPR34_DE_R  | GTTCAGCTCTTGTGTTCTCA     |
| CABLES1_DE_F   | GCTGACCAAGTAGAATCACGT   | SCAMP5_DE_F | CCATTGGTTTTAATCAGTCCCCTA |
| CABLES1_DE_R   | GAGATTCAGGAGGCCAGGAG    | SCAMP5_DE_R | CCCATACACAGGTGCATTAATTG  |
| STARD13_DE_F   | AAGCCCTGTGTGCTGCTTTTG   | ANG_DE_F    | ACACTGCAAGAATCAAGCCG     |
| STARD13_DE_R   | GGACTGCCGGACCTATGAAA    | ANG_DE_R    | CTCTCTCATCCCACACCCAA     |
| MTSS1_DE_F     | CGTGATGCAGAAGGAAGCC     | PDK4_DE_F   | TGCAAAGGGAGGGGAAAGA      |
| MTSS1_DE_R     | CCCAGTTCCTTCGTTGAA      | PDK4_DE_R   | AATGTCCATCTCCTCCCCAG     |
| DAB2_DE_F      | GGAGACTCAAGAAGAAAGCAACA | ANKH_DE_F   | TCAAACACAGCACATTCCCC     |
| DAB2_DE_R      | ATTCCGCACTTTAGCTGAGG    | ANKH_DE_R   | ATAGGACTGGGCAAAGGAGG     |
| MAFB_DE_F      | GGGGCAGAGAAGAGGCTACT    | ASRGL1_DE_F | TGCAGAAGTCCAGTTTATCAGT   |
| MAFB_DE_R      | CGACTTCCTTTCCCTGACTG    | ASRGL1_DE_R | GCAATGCTGGGTTAGGCAAA     |
| CREM_DE_F      | CTGCTTCCTCCACTTCCTGA    | F13A1_E_F   | AGCCAAATAAAGGGGCAAGT     |
| CREM_DE_R      | TGAAACACTCAGGACAGGGG    | F13A1_E_R   | CTTTCACAGGAAGGGCTCTG     |
| THBS1_DE_F     | AGGCAGAATAACCAGGAAGCT   | CXCL10_LE_F | GTGAGCAGGAGGACATCAGT     |
| THBS1_DE_R     | GATTGGGTAGAGCTGTCCGA    | CXCL10_LE_R | TGTGAGCTCGGGGAATCTTT     |
| HRH1_DE_F      | AGGCCTAAAAGTCCAGG       | ETV7_pro_F  | CATCACCTTTCCATCTGTCTC    |
| HRH1_DE_R      | CTGCGTCCACACTTTCATCC    | ETV7_pro_R  | TCTTCGGTGTCTTCTGGTTTGT   |
| CRHBP_DE_F     | AGCCAAGAACCCCTATCAACT   |             |                          |
| CRHBP_DE_R     | AGGGAAAATGCTACCAAGTGC   |             |                          |
| MERTK_DE_F     | TCAAACCAGCAGAGGACCAA    |             |                          |
| MERTK_DE_R     | GGTCGTCCCTCTTAGAGCAA    |             |                          |
